# Supplementary material for: Characteristics of Electroencephalogram in the Prefrontal Cortex during Deep Brain Stimulation of Subthalamic Nucleus in Parkinson’s Disease under Propofol General Anesthesia
Source: MDPI journal article supplement (doi:10.3390/brainsci13010062), 2022-12-29
Supplement: s1 [file s1]

**Table S1 Comparison of EEG parameters between two groups of patients with Parkinson's disease in three states**

|                               | Total<br>n=43   | No benzodiazepine users<br>n=25 | Benzodiazepine users<br>n=18 | <i>p</i> value    |
|-------------------------------|-----------------|---------------------------------|------------------------------|-------------------|
| Awake state before anesthesia |                 |                                 |                              |                   |
| PSI                           | 89.86±6.89      | 88.90±8.42                      | 91.19±3.74                   | 0.92 <sup>b</sup> |
| SEF_L, Hz                     | 22.81±4.14      | 22.43±4.36                      | 23.34±3.89                   | 0.49 <sup>a</sup> |
| SEF_R, Hz                     | 22.58±4.13      | 21.66±4.23                      | 23.87±3.73                   | 0.08 <sup>a</sup> |
| Total time of SUP, min        | 0.35 (0, 6.5)   | 0.43 (0, 6.5)                   | 0.13 (0, 5.48)               | 0.26 <sup>b</sup> |
| Maximum SUP ratio, %          | 2 (0, 28)       | 2 (0, 8)                        | 2 (0, 28)                    | 0.62 <sup>b</sup> |
| EMG, %                        | 59.90±22.00     | 56.20±23.58                     | 65.04±19.04                  | 0.20 <sup>a</sup> |
| During propofol anesthesia    |                 |                                 |                              |                   |
| PSI                           | 48.68±12.65     | 49.33±13.31                     | 47.79±12.00                  | 0.60 <sup>b</sup> |
| SEF_L, Hz                     | 12.70±3.33      | 12.20±3.66                      | 13.40±2.74                   | 0.25 <sup>a</sup> |
| SEF_R, Hz                     | 12.61±3.29      | 12.18±3.63                      | 13.21±2.74                   | 0.32 <sup>a</sup> |
| Total time of SUP, min        | 1.2(0, 124.10)  | 2.55(0, 124.10)                 | 1.02(0, 29.17)               | 0.77 <sup>b</sup> |
| Maximum SUP ratio, %          | 6 (0, 34)       | 4 (0, 34)                       | 6 (0, 28)                    | 0.98 <sup>b</sup> |
| MER period                    |                 |                                 |                              |                   |
| PSI                           | 62.46±13.07     | 60.94±12.76                     | 64.58±13.58                  | 0.20 <sup>b</sup> |
| SEF_L, Hz                     | 15.42±4.07      | 14.54±3.96                      | 16.65±4.01                   | 0.10 <sup>a</sup> |
| SEF_R, Hz                     | 15.36±4.07      | 14.51±4.02                      | 16.55±3.94                   | 0.11 <sup>a</sup> |
| Total time of SUP, min        | 2.57(0, 141.33) | 4.83(0.35, 141.33)              | 1.40 (0, 12.40)              | 0.01 <sup>b</sup> |
| Maximum SUP ratio, %          | 6 (0, 30)       | 6(4, 30)                        | 4 (0, 14)                    | 0.02 <sup>b</sup> |

Numbers indicate means ± standard deviations (SD) or median (minimum, maximum). Differences between the two groups were analyzed using the t test<sup>a</sup> or Wilcoxon rank sum test<sup>b</sup>. Significance was recognized when  $p < 0.05$ .

EEG:electroencephalogram, PSI: Patient State Index, SEF\_L: spectral edge frequency, left side, SEF\_R: spectral edge frequency, right side, SUP: Suppression, EMG: electromyography, MER: microelectrode recording.

**Table S2 Comparison of average power spectral density at different frequencies between two groups of patients with Parkinson's disease in three states**

|                               | No benzodiazepine users<br>n=25 | Benzodiazepine users<br>n=18 | <i>p</i> value    |
|-------------------------------|---------------------------------|------------------------------|-------------------|
| Awake state before anesthesia |                                 |                              |                   |
| SWO                           | 8.86 (3.54)                     | 9.09 (6.57)                  | 0.86 <sup>b</sup> |
| Delta                         | 5.95 (3.46)                     | 4.63 (5.38)                  | 0.68 <sup>b</sup> |
| Theta                         | -2.85 (3.69)                    | -3.56 (3.51)                 | 0.30 <sup>b</sup> |
| Alpha                         | -5.08 ±2.19                     | -4.84 ±2.67                  | 0.75 <sup>a</sup> |
| Beta                          | -5.46 ±3.82                     | -4.92 ±3.92                  | 0.66 <sup>a</sup> |
| Gamma                         | -5.79 ±5.27                     | -4.75 ±4.78                  | 0.51 <sup>a</sup> |
| Propofol anesthesia state     |                                 |                              |                   |
| SWO                           | 10.24 ±2.46                     | 10.16 ±2.06                  | 0.90 <sup>a</sup> |
| Delta                         | 6.66 ±2.06                      | 6.65 ±1.89                   | 0.98 <sup>a</sup> |
| Theta                         | -2.53 (2.64)                    | -1.73 (4.52)                 | 0.33 <sup>b</sup> |
| Alpha                         | -3.47 ±2.76                     | -2.18 ±3.59                  | 0.19 <sup>a</sup> |
| Beta                          | -11.01 ±2.99                    | -9.48 ±3.51                  | 0.13 <sup>a</sup> |
| Gamma                         | -17.40 ±2.04                    | -16.36 ±2.64                 | 0.15 <sup>a</sup> |
| MER period                    |                                 |                              |                   |
| SWO                           | 4.64 ±3.10                      | 5.21 ±3.11                   | 0.55 <sup>a</sup> |
| Delta                         | 2.48 (3.45)                     | 2.39 (2.46)                  | 0.96 <sup>b</sup> |
| Theta                         | -4.57 ±2.13                     | -3.96 ±1.98                  | 0.35 <sup>a</sup> |
| Alpha                         | -5.77 (3.18)                    | -5.12 (5.96)                 | 0.18 <sup>b</sup> |
| Beta                          | -13.20 ±2.65                    | -10.92 ±3.78                 | 0.03 <sup>a</sup> |
| Gamma                         | -18.28 ±2.38                    | -16.24 ±3.37                 | 0.03 <sup>a</sup> |

Numbers indicate means ± standard deviations or median (interquartile range). Differences between the two groups were analyzed using the *t* test<sup>a</sup> or Mann-Whitney U test<sup>b</sup>. Significance was recognized when *p* < 0.05. SWO: slow-wave oscillation, MER: microelectrode recording.
